# Supplementary material for: Transcriptome Analysis of the Asian Honey Bee Apis cerana cerana
Source: PLoS One. 2012 Oct 24;7(10):e47954. doi: 10.1371/journal.pone.0047954 (PMC3480438; doi:10.1371/journal.pone.0047954)
Supplement: Table S2 — KEGG analysis of the 15607 unigenes. (XLS) [file pone.0047954.s003.xls]

## Sheet: Sheet1
#	Pathway	Count (15607)	Pathway ID
1	Metabolic pathways	1882(12.06%)	ko01100
2	Regulation of actin cytoskeleton	603(3.86%)	ko04810
3	Pathways in cancer	557(3.57%)	ko05200
4	RNA transport	542(3.47%)	ko03013
5	Focal adhesion	529(3.39%)	ko04510
6	Vascular smooth muscle contraction	451(2.89%)	ko04270
7	Purine metabolism	425(2.72%)	ko00230
8	Spliceosome	409(2.62%)	ko03040
9	MAPK signaling pathway	396 (2.54%)	ko04010
10	Tight junction	369(2.36%)	ko04530
11	Calcium signaling pathway	357 (2.29%)	ko04020
12	Endocytosis	345(2.21%)	ko04144
13	Amoebiasis	344(2.2%)	ko05146
14	Huntington's disease	340(2.18%)	ko05016
15	mRNA surveillance pathway	335(2.15%)	ko03015
16	Dilated cardiomyopathy	330(2.11%)	ko05414
17	Ubiquitin mediated proteolysis	330(2.11%)	ko04120
18	Influenza A	328(2.1%)	ko05164
19	Wnt signaling pathway	314(2.01%)	ko04310
20	Vibrio cholerae infection	313(2.01%)	ko05110
21	Phagosome	304(1.95%)	ko04145
22	Hypertrophic cardiomyopathy (HCM)	304(1.95%)	ko05410
23	Chemokine signaling pathway	298(1.91%)	ko04062
24	Pancreatic secretion	295(1.89%)	ko04972
25	Alzheimer's disease	293(1.88%)	ko05010
26	Adherens junction	291(1.86%)	ko04520
27	Gastric acid secretion	288(1.85%)	ko04971
28	Protein processing in endoplasmic reticulum	285(1.83%)	ko04141
29	Neurotrophin signaling pathway	271(1.74%)	ko04722
30	Tuberculosis	270(1.73%)	ko05152
31	Pathogenic Escherichia coli infection	269(1.72%)	ko05130
32	Insulin signaling pathway	267(1.71%)	ko04910
33	Lysosome	265(1.7%)	ko04142
34	Fc gamma R-mediated phagocytosis	262(1.68%)	ko04666
35	Axon guidance	253(1.62%)	ko04360
36	Cell cycle	241(1.54%)	ko04110
37	Glutamatergic synapse	236(1.51%)	ko04724
38	Leukocyte transendothelial migration	235(1.51%)	ko04670
39	Oocyte meiosis	235(1.51%)	ko04114
40	Phosphatidylinositol signaling system	234(1.5%)	ko04070
41	Salivary secretion	232(1.49%)	ko04970
42	ECM-receptor interaction	227(1.45%)	ko04512
43	Lysine degradation	225(1.44%)	ko00310
44	Pyrimidine metabolism	225(1.44%)	ko00240
45	GnRH signaling pathway	223(1.43%)	ko04912
46	Bacterial invasion of epithelial cells	219(1.4%)	ko05100
47	Neuroactive ligand-receptor interaction	217(1.39%)	ko04080
48	Cardiac muscle contraction	215(1.38%)	ko04260
49	Shigellosis	215(1.38%)	ko05131
50	RNA degradation	215(1.38%)	ko03018
51	Ribosome biogenesis in eukaryotes	203(1.3%)	ko03008
52	Bile secretion	202(1.29%)	ko04976
53	Viral myocarditis	202(1.29%)	ko05416
54	Melanogenesis	200(1.28%)	ko04916
55	Protein digestion and absorption	198(1.27%)	ko04974
56	Dorso-ventral axis formation	195(1.25%)	ko04320
57	Toxoplasmosis	188(1.2%)	ko05145
58	Glycerophospholipid metabolism	187(1.2%)	ko00564
59	Gap junction	183(1.17%)	ko04540
60	Cholinergic synapse	181(1.16%)	ko04725
61	Phototransduction - fly	181(1.16%)	ko04745
62	Progesterone-mediated oocyte maturation	179(1.15%)	ko04914
63	Measles	178(1.14%)	ko05162
64	Long-term potentiation	178(1.14%)	ko04720
65	Parkinson's disease	169(1.08%)	ko05012
66	T cell receptor signaling pathway	163(1.04%)	ko04660
67	Inositol phosphate metabolism	160(1.03%)	ko00562
68	Oxidative phosphorylation	159(1.02%)	ko00190
69	ErbB signaling pathway	158(1.01%)	ko04012
70	Arrhythmogenic right ventricular cardiomyopathy (ARVC)	156(1%)	ko05412
71	Notch signaling pathway	147(0.94%)	ko04330
72	Amyotrophic lateral sclerosis (ALS)	143(0.92%)	ko05014
73	Prostate cancer	140(0.9%)	ko05215
74	Glioma	137(0.88%)	ko05214
75	Toll-like receptor signaling pathway	136(0.87%)	ko04620
76	Pertussis	135(0.86%)	ko05133
77	TGF-beta signaling pathway	135(0.86%)	ko04350
78	Olfactory transduction	135(0.86%)	ko04740
79	Renal cell carcinoma	134(0.86%)	ko05211
80	Peroxisome	133(0.85%)	ko04146
81	Small cell lung cancer	133(0.85%)	ko05222
82	Amino sugar and nucleotide sugar metabolism	131(0.84%)	ko00520
83	Chagas disease (American trypanosomiasis)	130(0.83%)	ko05142
84	VEGF signaling pathway	130(0.83%)	ko04370
85	Fc epsilon RI signaling pathway	128(0.82%)	ko04664
86	B cell receptor signaling pathway	126(0.81%)	ko04662
87	Glycerolipid metabolism	126(0.81%)	ko00561
88	PPAR signaling pathway	125(0.8%)	ko03320
89	Leishmaniasis	124(0.79%)	ko05140
90	Hedgehog signaling pathway	122(0.78%)	ko04340
91	Cell adhesion molecules (CAMs)	122(0.78%)	ko04514
92	Hepatitis C	121(0.78%)	ko05160
93	Glycine, serine and threonine metabolism	121(0.78%)	ko00260
94	Long-term depression	121(0.78%)	ko04730
95	RNA polymerase	121(0.78%)	ko03020
96	ABC transporters	118(0.76%)	ko02010
97	Osteoclast differentiation	117(0.75%)	ko04380
98	Apoptosis	113(0.72%)	ko04210
99	Endocrine and other factor-regulated calcium reabsorption	112(0.72%)	ko04961
100	Cysteine and methionine metabolism	109(0.7%)	ko00270
101	Natural killer cell mediated cytotoxicity	108(0.69%)	ko04650
102	Ribosome	108(0.69%)	ko03010
103	Basal transcription factors	107(0.69%)	ko03022
104	Adipocytokine signaling pathway	107(0.69%)	ko04920
105	Aminoacyl-tRNA biosynthesis	107(0.69%)	ko00970
106	Colorectal cancer	106(0.68%)	ko05210
107	Endometrial cancer	105(0.67%)	ko05213
108	mTOR signaling pathway	105(0.67%)	ko04150
109	Fat digestion and absorption	103(0.66%)	ko04975
110	Basal cell carcinoma	102(0.65%)	ko05217
111	Epithelial cell signaling in Helicobacter pylori infection	101(0.65%)	ko05120
112	Arginine and proline metabolism	100(0.64%)	ko00330
113	Prion diseases	99(0.63%)	ko05020
114	Jak-STAT signaling pathway	98(0.63%)	ko04630
115	p53 signaling pathway	97(0.62%)	ko04115
116	Chronic myeloid leukemia	97(0.62%)	ko05220
117	Glycolysis / Gluconeogenesis	96(0.62%)	ko00010
118	Phototransduction	94(0.6%)	ko04744
119	Type II diabetes mellitus	94(0.6%)	ko04930
120	Citrate cycle (TCA cycle)	94(0.6%)	ko00020
121	Pyruvate metabolism	92(0.59%)	ko00620
122	Vitamin digestion and absorption	89(0.57%)	ko04977
123	Nucleotide excision repair	88(0.56%)	ko03420
124	Glutathione metabolism	85(0.54%)	ko00480
125	Vasopressin-regulated water reabsorption	84(0.54%)	ko04962
126	Pancreatic cancer	84(0.54%)	ko05212
127	Aldosterone-regulated sodium reabsorption	83(0.53%)	ko04960
128	Tyrosine metabolism	82(0.53%)	ko00350
129	Drug metabolism - other enzymes	81(0.52%)	ko00983
130	Non-small cell lung cancer	81(0.52%)	ko05223
131	Starch and sucrose metabolism	81(0.52%)	ko00500
132	DNA replication	81(0.52%)	ko03030
133	Complement and coagulation cascades	80(0.51%)	ko04610
134	Mineral absorption	79(0.51%)	ko04978
135	Cytosolic DNA-sensing pathway	78(0.5%)	ko04623
136	NOD-like receptor signaling pathway	78(0.5%)	ko04621
137	Tryptophan metabolism	77(0.49%)	ko00380
138	Carbohydrate digestion and absorption	77(0.49%)	ko04973
139	Acute myeloid leukemia	76(0.49%)	ko05221
140	Valine, leucine and isoleucine degradation	75(0.48%)	ko00280
141	Base excision repair	73(0.47%)	ko03410
142	N-Glycan biosynthesis	71(0.45%)	ko00510
143	Retinol metabolism	69(0.44%)	ko00830
144	Metabolism of xenobiotics by cytochrome P450	67(0.43%)	ko00980
145	Drug metabolism - cytochrome P450	67(0.43%)	ko00982
146	Hematopoietic cell lineage	66(0.42%)	ko04640
147	Alanine, aspartate and glutamate metabolism	66(0.42%)	ko00250
148	Galactose metabolism	60(0.38%)	ko00052
149	Thyroid cancer	60(0.38%)	ko05216
150	Circadian rhythm - fly	60(0.38%)	ko04711
151	Fructose and mannose metabolism	60(0.38%)	ko00051
152	Systemic lupus erythematosus	59(0.38%)	ko05322
153	Butanoate metabolism	58(0.37%)	ko00650
154	MAPK signaling pathway - fly	58(0.37%)	ko04013
155	alpha-Linolenic acid metabolism	57(0.37%)	ko00592
156	Other types of O-glycan biosynthesis	56(0.36%)	ko00514
157	Linoleic acid metabolism	55(0.35%)	ko00591
158	Antigen processing and presentation	55(0.35%)	ko04612
159	Melanoma	54(0.35%)	ko05218
160	Pentose phosphate pathway	54(0.35%)	ko00030
161	Steroid hormone biosynthesis	52(0.33%)	ko00140
162	Ether lipid metabolism	52(0.33%)	ko00565
163	Fatty acid metabolism	52(0.33%)	ko00071
164	Pentose and glucuronate interconversions	51(0.33%)	ko00040
165	Homologous recombination	50(0.32%)	ko03440
166	Nitrogen metabolism	50(0.32%)	ko00910
167	Proximal tubule bicarbonate reclamation	50(0.32%)	ko04964
168	Arachidonic acid metabolism	49(0.31%)	ko00590
169	Circadian rhythm - mammal	48(0.31%)	ko04710
170	Rheumatoid arthritis	48(0.31%)	ko05323
171	Proteasome	48(0.31%)	ko03050
172	SNARE interactions in vesicular transport	48(0.31%)	ko04130
173	Insect hormone biosynthesis	47(0.3%)	ko00981
174	Bladder cancer	47(0.3%)	ko05219
175	Biosynthesis of unsaturated fatty acids	46(0.29%)	ko01040
176	Taste transduction	46(0.29%)	ko04742
177	Valine, leucine and isoleucine biosynthesis	46(0.29%)	ko00290
178	Propanoate metabolism	45(0.29%)	ko00640
179	Mismatch repair	45(0.29%)	ko03430
180	Porphyrin and chlorophyll metabolism	44(0.28%)	ko00860
181	Sphingolipid metabolism	44(0.28%)	ko00600
182	Glycosylphosphatidylinositol(GPI)-anchor biosynthesis	44(0.28%)	ko00563
183	Malaria	43(0.28%)	ko05144
184	RIG-I-like receptor signaling pathway	43(0.28%)	ko04622
185	Cytokine-cytokine receptor interaction	43(0.28%)	ko04060
186	beta-Alanine metabolism	42(0.27%)	ko00410
187	Collecting duct acid secretion	42(0.27%)	ko04966
188	Glycosaminoglycan degradation	41(0.26%)	ko00531
189	Ascorbate and aldarate metabolism	40(0.26%)	ko00053
190	African trypanosomiasis	39(0.25%)	ko05143
191	Other glycan degradation	37(0.24%)	ko00511
192	Terpenoid backbone biosynthesis	36(0.23%)	ko00900
193	Staphylococcus aureus infection	36(0.23%)	ko05150
194	Phenylalanine metabolism	33(0.21%)	ko00360
195	Protein export	32(0.21%)	ko03060
196	Riboflavin metabolism	32(0.21%)	ko00740
197	Glycosaminoglycan biosynthesis - heparan sulfate	32(0.21%)	ko00534
198	One carbon pool by folate	31(0.2%)	ko00670
199	Histidine metabolism	29(0.19%)	ko00340
200	Renin-angiotensin system	29(0.19%)	ko04614
201	Glyoxylate and dicarboxylate metabolism	28(0.18%)	ko00630
202	Regulation of autophagy	27(0.17%)	ko04140
203	Selenocompound metabolism	26(0.17%)	ko00450
204	Folate biosynthesis	25(0.16%)	ko00790
205	Pantothenate and CoA biosynthesis	24(0.15%)	ko00770
206	Maturity onset diabetes of the young	24(0.15%)	ko04950
207	Sulfur metabolism	22(0.14%)	ko00920
208	Non-homologous end-joining	22(0.14%)	ko03450
209	Cyanoamino acid metabolism	22(0.14%)	ko00460
210	Mucin type O-Glycan biosynthesis	20(0.13%)	ko00512
211	Nicotinate and nicotinamide metabolism	20(0.13%)	ko00760
212	Glycosaminoglycan biosynthesis - chondroitin sulfate	19(0.12%)	ko00532
213	Type I diabetes mellitus	19(0.12%)	ko04940
214	Taurine and hypotaurine metabolism	18(0.12%)	ko00430
215	Autoimmune thyroid disease	18(0.12%)	ko05320
216	Fatty acid biosynthesis	17(0.11%)	ko00061
217	Steroid biosynthesis	17(0.11%)	ko00100
218	Glycosaminoglycan biosynthesis - keratan sulfate	16(0.1%)	ko00533
219	Sulfur relay system	16(0.1%)	ko04122
220	Glycosphingolipid biosynthesis - lacto and neolacto series	16(0.1%)	ko00601
221	Synthesis and degradation of ketone bodies	16(0.1%)	ko00072
222	Ubiquinone and other terpenoid-quinone biosynthesis	15(0.1%)	ko00130
223	Glycosphingolipid biosynthesis - globo series	14(0.09%)	ko00603
224	Primary immunodeficiency	13(0.08%)	ko05340
225	Glycosphingolipid biosynthesis - ganglio series	12(0.08%)	ko00604
226	D-Arginine and D-ornithine metabolism	11(0.07%)	ko00472
227	Fatty acid elongation	10(0.06%)	ko00062
228	Vitamin B6 metabolism	9(0.06%)	ko00750
229	D-Glutamine and D-glutamate metabolism	8(0.05%)	ko00471
230	Biotin metabolism	8(0.05%)	ko00780
231	Primary bile acid biosynthesis	7(0.04%)	ko00120
232	Lysine biosynthesis	7(0.04%)	ko00300
233	Caffeine metabolism	7(0.04%)	ko00232
234	Polyketide sugar unit biosynthesis	5(0.03%)	ko00523
235	Phenylalanine, tyrosine and tryptophan biosynthesis	5(0.03%)	ko00400
236	Thiamine metabolism	5(0.03%)	ko00730
237	Butirosin and neomycin biosynthesis	4(0.03%)	ko00524
238	Intestinal immune network for IgA production	3(0.02%)	ko04672
239	Lipoic acid metabolism	2(0.01%)	ko00785
240	Allograft rejection	2(0.01%)	ko05330
241	Graft-versus-host disease	2(0.01%)	ko05332
242	Asthma	1(0.01%)	ko05310
