# Supplementary material for: Transcriptome Analysis of the Asian Honey Bee Apis cerana cerana
Source: PLoS One. 2012 Oct 24;7(10):e47954. doi: 10.1371/journal.pone.0047954 (PMC3480438; doi:10.1371/journal.pone.0047954)
Supplement: Table S5 — KEGG pathway enrichment analysis of the differentially expressed genes. (XLS) [file pone.0047954.s006.xls]

## Sheet: Sheet1
#	Pathway	DEGs with pathway annotation (157)	All genes with pathway annotation (15607)	Pvalue	Qvalue	Pathway ID	Differentially expressed genes
1	Metabolic pathways	38	1873	1.53617e-05	0.00215063	ko01100	Unigene15160, CL2199.Contig1, Unigene31701, CL3257.Contig1, CL1143.Contig1, Unigene14814, CL1495.Contig1, CL4487.Contig1, CL1653.Contig1, Unigene5993, Unigene27845, CL4831.Contig1, CL5073.Contig1, CL5340.Contig1, CL415.Contig1, Unigene16525, CL4321.Contig1, Unigene14723, CL5047.Contig1, CL2136.Contig1, Unigene16304, Unigene16153, Unigene18344, CL520.Contig1, CL612.Contig1, Unigene27728, Unigene15…
2	Pentose and glucuronate interconversions	5	51	0.000156306	0.0109414	ko00040	Unigene5993, Unigene16525, CL2136.Contig1, Unigene15550, Unigene15322
3	Ascorbate and aldarate metabolism	4	37	0.00050263	0.0158142	ko00053	Unigene5993, Unigene16525, CL2136.Contig1, Unigene15322
4	Metabolism of xenobiotics by cytochrome P450	5	67	0.000564792	0.0158142	ko00980	CL4487.Contig1, Unigene5993, Unigene16525, CL520.Contig1, Unigene15322
5	Drug metabolism - cytochrome P450	5	67	0.000564792	0.0158142	ko00982	CL4487.Contig1, Unigene5993, Unigene16525, CL520.Contig1, Unigene15322
6	Phenylalanine, tyrosine and tryptophan biosynthesis	2	5	0.000985744	0.0220011	ko00400	Unigene31701, CL5047.Contig1
7	Drug metabolism - other enzymes	5	81	0.00133882	0.0220011	ko00983	CL4487.Contig1, Unigene5993, CL415.Contig1, Unigene16525, Unigene15322
8	Starch and sucrose metabolism	5	81	0.00133882	0.0220011	ko00500	Unigene14814, Unigene5993, Unigene16525, Unigene27728, Unigene15322
9	Tyrosine metabolism	5	82	0.00141436	0.0220011	ko00350	Unigene31701, CL3257.Contig1, CL1143.Contig1, CL1653.Contig1, CL520.Contig1
10	Fatty acid metabolism	4	51	0.00170545	0.0233326	ko00071	Unigene27845, CL2136.Contig1, Unigene15811, Unigene16458
11	Steroid hormone biosynthesis	4	52	0.00183327	0.0233326	ko00140	CL4487.Contig1, Unigene5993, Unigene16525, Unigene15322
12	Lysine biosynthesis	2	7	0.00204281	0.0238328	ko00300	CL2199.Contig1, Unigene19104
13	Other types of O-glycan biosynthesis	4	56	0.00241115	0.0259663	ko00514	Unigene5993, Unigene16525, CL3411.Contig1, Unigene15322
14	Riboflavin metabolism	3	32	0.00399935	0.0399935	ko00740	CL3467.Contig1, CL1143.Contig1, CL1653.Contig1
15	Phenylalanine metabolism	3	33	0.00436716	0.0407601	ko00360	Unigene31701, CL1495.Contig1, CL5047.Contig1
16	Retinol metabolism	4	69	0.00513193	0.0449044	ko00830	CL4487.Contig1, Unigene5993, Unigene16525, Unigene15322
17	Glycerolipid metabolism	5	126	0.00890757	0.0720779	ko00561	CL5340.Contig1, Unigene14723, CL2136.Contig1, Unigene18344, Unigene18670
18	Ubiquinone and other terpenoid-quinone biosynthesis	2	15	0.00968882	0.0720779	ko00130	Unigene31701, CL1495.Contig1
19	Porphyrin and chlorophyll metabolism	3	44	0.009782	0.0720779	ko00860	Unigene5993, Unigene16525, Unigene15322
20	Phototransduction	4	94	0.0149358	0.104551	ko04744	CL3432.Contig1, Unigene15067, Unigene33977, Unigene16858
21	Melanogenesis	6	200	0.015759	0.10506	ko04916	CL1143.Contig1, CL1653.Contig1, CL3432.Contig1, Unigene15067, Unigene41656, CL3178.Contig1
22	Glyoxylate and dicarboxylate metabolism	2	28	0.0320357	0.203863	ko00630	Unigene16304, CL612.Contig1
23	Renin-angiotensin system	2	29	0.0341856	0.208086	ko04614	CL4831.Contig1, Unigene16630
24	PPAR signaling pathway	4	124	0.0365594	0.213263	ko03320	Unigene27845, Unigene18344, Unigene15811, Unigene16356
25	Valine, leucine and isoleucine degradation	3	75	0.0398572	0.2232	ko00280	Unigene27845, CL2136.Contig1, Unigene16458
26	Tryptophan metabolism	3	77	0.0425627	0.224544	ko00380	CL2199.Contig1, CL2136.Contig1, Unigene19104
27	Amino sugar and nucleotide sugar metabolism	4	131	0.0433049	0.224544	ko00520	Unigene1707, Unigene16961, CL782.Contig1, Unigene15871
28	Olfactory transduction	4	135	0.0474535	0.237268	ko04740	CL3432.Contig1, Unigene15067, CL782.Contig1, Unigene16858
29	Bile secretion	5	202	0.053475	0.258155	ko04976	CL4487.Contig1, Unigene5993, Unigene16525, Unigene41656, Unigene15322
30	Insect hormone biosynthesis	2	38	0.055841	0.260591	ko00981	CL415.Contig1, Unigene16601
31	beta-Alanine metabolism	2	40	0.0611635	0.276222	ko00410	Unigene27845, CL2136.Contig1
32	Glycolysis / Gluconeogenesis	3	96	0.0726036	0.317641	ko00010	CL2136.Contig1, Unigene16153, Unigene16072
33	Propanoate metabolism	2	45	0.0751753	0.318925	ko00640	Unigene27845, CL2136.Contig1
34	Fat digestion and absorption	3	103	0.0855218	0.352149	ko04975	CL5340.Contig1, Unigene18670, Unigene16356
35	Ribosome	3	108	0.0953047	0.374067	ko03010	Unigene16003, Unigene14816, CL3917.Contig1
36	Fatty acid elongation in mitochondria	1	10	0.0961886	0.374067	ko00062	Unigene16458
37	Long-term potentiation	4	178	0.105107	0.389742	ko04720	CL3432.Contig1, Unigene15067, Unigene41656, CL3178.Contig1
38	Linoleic acid metabolism	2	55	0.105787	0.389742	ko00591	CL4487.Contig1, Unigene32783
39	Galactose metabolism	2	60	0.122153	0.427536	ko00052	Unigene14814, Unigene16153
40	Fructose and mannose metabolism	2	60	0.122153	0.427536	ko00051	Unigene16153, Unigene32783
41	Lysosome	5	265	0.129362	0.441723	ko04142	CL3467.Contig1, Unigene15160, Unigene6416, CL3886.Contig1, Unigene16771
42	Limonene and pinene degradation	1	15	0.140777	0.464055	ko00903	CL2136.Contig1
43	Alanine, aspartate and glutamate metabolism	2	66	0.142531	0.464055	ko00250	Unigene16905, Unigene16318
44	Calcium signaling pathway	6	356	0.150052	0.467409	ko04020	Unigene15646, CL3432.Contig1, CL568.Contig1, Unigene15067, CL1636.Contig1, Unigene41656
45	Peroxisome	3	133	0.150239	0.467409	ko04146	Unigene27845, CL4467.Contig1, Unigene15811
46	Tight junction	6	369	0.168443	0.512652	ko04530	CL5200.Contig1, CL59.Contig1, Unigene36461, CL345.Contig1, CL5206.Contig1, Unigene7171
47	Folate biosynthesis	1	20	0.183178	0.533189	ko00790	CL5073.Contig1
48	Notch signaling pathway	3	147	0.184548	0.533189	ko04330	CL4902.Contig1, CL3217.Contig1, CL3178.Contig1
49	GnRH signaling pathway	4	223	0.187346	0.533189	ko04912	CL3432.Contig1, CL59.Contig1, Unigene15067, Unigene41656
50	Chemokine signaling pathway	5	303	0.190425	0.533189	ko04062	Unigene15700, CL59.Contig1, Unigene41656, CL5206.Contig1, Unigene15817
51	Salivary secretion	4	232	0.205818	0.564991	ko04970	Unigene16699, CL3432.Contig1, Unigene15067, Unigene41656
52	Glutathione metabolism	2	85	0.210697	0.567261	ko00480	CL4831.Contig1, CL520.Contig1
53	Vitamin digestion and absorption	2	89	0.22548	0.592693	ko04977	CL5340.Contig1, CL69.Contig1
54	Lysine degradation	3	164	0.22861	0.592693	ko00310	CL2199.Contig1, CL2136.Contig1, Unigene19104
55	Parkinson's disease	3	168	0.239263	0.609034	ko05012	CL568.Contig1, Unigene16449, Unigene34160
56	Citrate cycle (TCA cycle)	2	94	0.244061	0.610154	ko00020	Unigene16304, CL612.Contig1
57	Histidine metabolism	1	29	0.254328	0.624666	ko00340	CL2136.Contig1
58	Arginine and proline metabolism	2	100	0.266435	0.643119	ko00330	CL4321.Contig1, CL2136.Contig1
59	Insulin signaling pathway	4	267	0.281825	0.667437	ko04910	CL3432.Contig1, Unigene15067, CL1636.Contig1, Unigene16003
60	Adipocytokine signaling pathway	2	106	0.28881	0.667437	ko04920	CL59.Contig1, Unigene15811
61	Glycerophospholipid metabolism	3	187	0.290812	0.667437	ko00564	Unigene16447, Unigene7808, Unigene18670
62	Other glycan degradation	1	37	0.312383	0.702564	ko00511	Unigene15160
63	Protein digestion and absorption	3	198	0.321055	0.702564	ko04974	CL4690.Contig1, Unigene6964, Unigene28811
64	Gastric acid secretion	4	288	0.329379	0.702564	ko04971	Unigene15646, CL3432.Contig1, Unigene15067, Unigene41656
65	ABC transporters	2	118	0.333265	0.702564	ko02010	CL672.Contig1, Unigene6525
66	Ribosome biogenesis in eukaryotes	3	203	0.334825	0.702564	ko03008	Unigene34232, Unigene15755, Unigene14810
67	Adherens junction	4	291	0.336227	0.702564	ko04520	Unigene16962, CL345.Contig1, CL5206.Contig1, CL3178.Contig1
68	Pancreatic secretion	4	295	0.345368	0.703566	ko04972	CL4690.Contig1, CL5340.Contig1, Unigene41656, CL782.Contig1
69	RIG-I-like receptor signaling pathway	1	43	0.352957	0.703566	ko04622	Unigene14723
70	Sphingolipid metabolism	1	44	0.359484	0.703566	ko00600	Unigene15160
71	RNA degradation	3	215	0.367802	0.703566	ko03018	Unigene16072, CL3671.Contig1, Unigene15149
72	Biosynthesis of unsaturated fatty acids	1	46	0.372342	0.703566	ko01040	Unigene27845
73	Taste transduction	1	46	0.372342	0.703566	ko04742	Unigene41656
74	Valine, leucine and isoleucine biosynthesis	1	46	0.372342	0.703566	ko00290	CL782.Contig1
75	VEGF signaling pathway	2	130	0.37691	0.703566	ko04370	Unigene15700, Unigene15817
76	Circadian rhythm - mammal	1	48	0.384944	0.708409	ko04710	CL4008.Contig1
77	Arachidonic acid metabolism	1	49	0.39115	0.708409	ko00590	CL520.Contig1
78	Glioma	2	137	0.401835	0.708409	ko05214	CL3432.Contig1, Unigene15067
79	Pentose phosphate pathway	1	51	0.403376	0.708409	ko00030	Unigene16153
80	Prostate cancer	2	140	0.412375	0.708409	ko05215	CL520.Contig1, CL3178.Contig1
81	Circadian rhythm - fly	1	54	0.42126	0.708409	ko04711	CL4008.Contig1
82	Leukocyte transendothelial migration	3	235	0.422049	0.708409	ko04670	Unigene15700, CL345.Contig1, Unigene15817
83	Oocyte meiosis	3	235	0.422049	0.708409	ko04114	CL3432.Contig1, Unigene15067, Unigene41656
84	Antigen processing and presentation	1	55	0.427102	0.708409	ko04612	Unigene15766
85	mRNA surveillance pathway	4	335	0.436332	0.708409	ko03015	Unigene14691, Unigene18747, Unigene34232, CL3217.Contig1
86	alpha-Linolenic acid metabolism	1	57	0.438611	0.708409	ko00592	Unigene27845
87	Butanoate metabolism	1	58	0.444279	0.708409	ko00650	Unigene32783
88	Huntington's disease	4	339	0.445286	0.708409	ko05016	CL568.Contig1, Unigene34160, Unigene7104, CL3178.Contig1
89	Amoebiasis	4	344	0.456417	0.71796	ko05146	CL3594.Contig1, Unigene28811, Unigene7104, CL3178.Contig1
90	RNA transport	6	542	0.464628	0.722755	ko03013	Unigene40631, Unigene14691, Unigene15133, Unigene34232, Unigene15755, Unigene16858
91	Vascular smooth muscle contraction	5	451	0.476859	0.73363	ko04270	Unigene15646, CL3432.Contig1, CL59.Contig1, Unigene15067, Unigene41656
92	Hematopoietic cell lineage	1	66	0.487623	0.742036	ko04640	CL4831.Contig1
93	Neurotrophin signaling pathway	3	277	0.529948	0.796562	ko04722	CL3432.Contig1, CL59.Contig1, Unigene15067
94	Phototransduction - fly	2	181	0.545944	0.796562	ko04745	CL3432.Contig1, Unigene15067
95	NOD-like receptor signaling pathway	1	78	0.54642	0.796562	ko04621	Unigene36461
96	Protein processing in endoplasmic reticulum	3	285	0.549239	0.796562	ko04141	Unigene16292, CL613.Contig1, CL1616.Contig1
97	Gap junction	2	183	0.551904	0.796562	ko04540	Unigene36826, Unigene41656
98	Alzheimer's disease	3	293	0.568064	0.805288	ko05010	CL3432.Contig1, Unigene15067, Unigene34160
99	Pyrimidine metabolism	2	189	0.569454	0.805288	ko00240	Unigene16318, Unigene7104
100	RNA polymerase	1	85	0.577568	0.808596	ko03020	Unigene7104
101	Dorso-ventral axis formation	2	195	0.586506	0.812979	ko04320	CL4902.Contig1, Unigene16176
102	Spliceosome	4	409	0.592415	0.813119	ko03040	Unigene35908, Unigene15149, Unigene16176, Unigene32627
103	Pyruvate metabolism	1	92	0.606591	0.817297	ko00620	CL2136.Contig1
104	Vibrio cholerae infection	3	313	0.612978	0.817297	ko05110	CL3594.Contig1, Unigene7104, CL3178.Contig1
105	Type II diabetes mellitus	1	94	0.614513	0.817297	ko04930	CL59.Contig1
106	Focal adhesion	5	529	0.618811	0.817297	ko04510	Unigene16699, Unigene15646, Unigene15700, Unigene28811, Unigene15817
107	Jak-STAT signaling pathway	1	98	0.629884	0.820523	ko04630	CL3178.Contig1
108	Prion diseases	1	99	0.633631	0.820523	ko05020	CL4902.Contig1
109	Neuroactive ligand-receptor interaction	2	217	0.644749	0.820523	ko04080	CL4690.Contig1, CL5206.Contig1
110	Bacterial invasion of epithelial cells	2	219	0.649712	0.820523	ko05100	Unigene15700, Unigene15817
111	mTOR signaling pathway	1	105	0.655333	0.820523	ko04150	Unigene16003
112	Basal transcription factors	1	107	0.662279	0.820523	ko03022	CL3178.Contig1
113	Aminoacyl-tRNA biosynthesis	1	107	0.662279	0.820523	ko00970	CL782.Contig1
114	Cysteine and methionine metabolism	1	109	0.669086	0.821685	ko00270	Unigene31701
115	Endocytosis	3	345	0.678134	0.825555	ko04144	Unigene6079, CL5206.Contig1, Unigene14810
116	Phosphatidylinositol signaling system	2	234	0.685203	0.82697	ko04070	CL3432.Contig1, Unigene15067
117	Glycine, serine and threonine metabolism	1	121	0.707159	0.846173	ko00260	Unigene14761
118	Fc epsilon RI signaling pathway	1	128	0.727323	0.861235	ko04664	CL59.Contig1
119	Chagas disease (American trypanosomiasis)	1	130	0.732827	0.861235	ko05142	Unigene16630
120	Renal cell carcinoma	1	134	0.743505	0.861235	ko05211	CL3178.Contig1
121	TGF-beta signaling pathway	1	135	0.746108	0.861235	ko04350	CL3178.Contig1
122	Purine metabolism	3	389	0.754053	0.861235	ko00230	Unigene16905, Unigene41656, Unigene7104
123	Pathogenic Escherichia coli infection	2	269	0.756656	0.861235	ko05130	Unigene36826, Unigene10432
124	Amyotrophic lateral sclerosis (ALS)	1	143	0.766005	0.864845	ko05014	Unigene32356
125	Oxidative phosphorylation	1	159	0.80127	0.890034	ko00190	Unigene34160
126	T cell receptor signaling pathway	1	163	0.809227	0.890034	ko04660	CL59.Contig1
127	Phagosome	2	304	0.813745	0.890034	ko04145	Unigene36826, Unigene6079
128	Hypertrophic cardiomyopathy (HCM)	2	304	0.813745	0.890034	ko05410	Unigene16090, Unigene16630
129	Progesterone-mediated oocyte maturation	1	179	0.838013	0.909471	ko04914	Unigene41656
130	Dilated cardiomyopathy	2	330	0.848133	0.913374	ko05414	Unigene16090, Unigene41656
131	Viral myocarditis	1	202	0.871992	0.9319	ko05416	Unigene16858
132	Cardiac muscle contraction	1	215	0.887958	0.941774	ko04260	Unigene16090
133	ECM-receptor interaction	1	227	0.900933	0.94835	ko04512	Unigene28811
134	Cell cycle	1	241	0.914194	0.955128	ko04110	CL3178.Contig1
135	Axon guidance	1	253	0.924146	0.958228	ko04360	Unigene34132
136	Fc gamma R-mediated phagocytosis	1	262	0.93085	0.958228	ko04666	CL59.Contig1
137	Regulation of actin cytoskeleton	3	608	0.947155	0.967896	ko04810	Unigene15646, Unigene15700, Unigene15817
138	Wnt signaling pathway	1	314	0.959528	0.972638	ko04310	CL3178.Contig1
139	Ubiquitin mediated proteolysis	1	330	0.96569	0.972638	ko04120	Unigene35908
140	Pathways in cancer	2	557	0.977796	0.977796	ko05200	CL520.Contig1, CL3178.Contig1
